# Supplementary material
Source: publisher site journal article supplement (https://www.dovepress.com/article/233270)
Supplement: Supplementary file 1 [file get_supplementary_file.php]

Addendum

**Table A**: The STOPP and START criteria used

| STOPP Criteria15 |
| --- |
| 1. Any drug prescribed without an evidence-based clinical indication. 2. Any drug prescribed beyond the recommended duration, where treatment duration is well defined. 3. Any duplicate drug class prescription e.g. two concurrent NSAIDs, SSRIs, loop diuretics, ACE inhibitors, anticoagulants (optimisation of monotherapy within a single drug class should be observed prior to considering a new agent). 4. Beta-blocker in combination with verapamil or diltiazem (risk of heart block). 5. Centrally-acting antihypertensives (e.g. methyldopa, clonidine, moxonidine, rilmenidine, guanfacine), unless clear intolerance of, or lack of efficacy with, other classes of antihypertensives (centrally-active antihypertensives are generally less well tolerated by older people than younger people) 6. Aldosterone antagonists (e.g. spironolactone, eplerenone) with concurrent potassium-conserving drugs (e.g. ACEI’s, ARB’s, amiloride, triamterene) without monitoring of serum potassium (risk of dangerous hyperkalaemia i.e. > 6.0 mmol/l – serum K should be monitored regularly, i.e. at least every 6 months). 7. ACE inhibitors or Angiotensin Receptor Blockers in patients with hyperkalaemia. 8. Loop diuretic as first-line treatment for hypertension (safer, more effective alternatives available). 9. Loop diuretic for treatment of hypertension with concurrent urinary incontinence (may exacerbate incontinence). 10. Antiplatelet agents with vitamin K antagonist, direct thrombin inhibitor or factor Xa inhibitors in patients with stable coronary, cerebrovascular or peripheral arterial disease (No added benefit from dual therapy). 11. NSAID and vitamin K antagonist, direct thrombin inhibitor or factor Xa inhibitors in combination (risk of major gastrointestinal bleeding). 12. NSAID with concurrent antiplatelet agent(s) without PPI prophylaxis (increased risk of peptic ulcer disease) 13. TriCyclic Antidepressants (TCAs) with dementia, narrow angle glaucoma, cardiac conduction abnormalities, prostatism, or prior history of urinary retention (risk of worsening these conditions). 14. Initiation of TriCyclic Antidepressants (TCAs) as first-line antidepressant treatment (higher risk of adverse drug reactions with TCAs than with SSRIs or SNRIs). 15. Neuroleptics with moderate-marked antimuscarinic/anticholinergic effects (chlorpromazine, clozapine, flupenthixol, fluphenzine, pipothiazine, promazine, zuclopenthixol) with a history of prostatism or previous urinary retention (high risk of urinary retention). 16. Antipsychotics (i.e. other than quetiapine or clozapine) in those with parkinsonism or Lewy Body Disease (risk of severe extra-pyramidal symptoms) 17. Anticholinergics/antimuscarinics in patients with delirium or dementia (risk of exacerbation of cognitive impairment). 18. Neuroleptics as hypnotics, unless sleep disorder is due to psychosis or dementia (risk of confusion, hypotension, extra-pyramidal side effects, falls). 19. PPI for uncomplicated peptic ulcer disease or erosive peptic oesophagitis at full therapeutic dosage for > 8 weeks (dose reduction or earlier discontinuation indicated). 20. Theophylline as monotherapy for COPD (safer, more effective alternative; risk of adverse effects due to narrow therapeutic index). 21. Long-term use of NSAID (>3 months) for symptom relief of osteoarthritis pain where paracetamol has not been tried (simple analgesics preferable and usually as effective for pain relief) 22. Long-term NSAID or colchicine (>3 months) for chronic treatment of gout where there is no contraindication to a xanthine-oxidase inhibitor (e.g. allopurinol, febuxostat) (xanthine-oxidase inhibitors are first choice prophylactic drugs in gout). 23. COX-2 selective NSAIDs with concurrent cardiovascular disease (increased risk of myocardial infarction and stroke) 24. Neuroleptic drugs (may cause gait dyspraxia, Parkinsonism). 25. Hypnotic Z-drugs e.g. zopiclone, zolpidem, zaleplon (may cause protracted day time sedation, ataxia). 26. Concomitant use of two or more drugs with antimuscarinic/anticholinergic properties (e.g. bladder antispasmodics, intestinal antispasmodics, tricyclic antidepressants, first generation antihistamines) (risk of increased antimuscarinic/anticholinergic toxicity) |

| START Criteria15 |
| --- |
| 1. Antihypertensive therapy where systolic blood pressure consistently > 160 mmHg and/or diastolic blood pressure consistently >90 mmHg; if systolic blood pressure > 140 mmHg and /or diastolic blood pressure > 90 mmHg, if diabetic. 2. Statin therapy with a documented history of coronary, cerebral or peripheral vascular disease, unless the patient’s status is end-of-life or age is > 85 years. 3. Beta-blocker with ischaemic heart disease. 4. Regular inhaled 2 agonist or antimuscarinic bronchodilator (e.g. ipratropium, tiotropium) for mild to moderate asthma or COPD. 5. Non-TCA antidepressant drug in the presence of persistent major depressive symptoms. 6. Selective serotonin reuptake inhibitor (or SNRI or pregabalin if SSRI contraindicated) for persistent severe anxiety that interferes with independent functioning. 7. Disease-modifying anti-rheumatic drug (DMARD) with active, disabling rheumatoid disease. 8. Bisphosphonates and vitamin D and calcium in patients taking long-term systemic corticosteroid therapy. 9. Vitamin D and calcium supplement in patients with known osteoporosis and/or previous fragility fracture(s) and/or (Bone Mineral Density T-scores more than -2.5 in multiple sites). 10. Bone anti-resorptive or anabolic therapy (e.g. bisphosphonate, strontium ranelate, teriparatide, denosumab) in patients with documented osteoporosis, where no pharmacological or clinical status contraindication exists (Bone Mineral Density T-scores -> 2.5 in multiple sites) and/or previous history of fragility fracture(s). |

**Table B**: The pharmacological classification of the most prescribed drugs

| Pharmacological classification of the most prescribed drugs | AR rural  (n=221) | TM rural  (n=425) | psig  using Chi2 Test |
| --- | --- | --- | --- |
|
| The cardiovascular system | | | |
| Beta-Blockers | 85  (38.46%) | 204  (48%) | 0,021s |
| Calcium channel blockers | 36  (16.29%) | 104  (24.47%) | 0,017s |
| Angiotensin-converting-enzyme (ACE) inhibitors | 67  (30.32%) | 203  (47.76%) | <0,001s |
| Sartans (Angiotensin II receptor blocker) | 38  (17.20%) | 104  (24.47%) | 0,034s |
| Thiazide diuretics | 5  (2.26%) | 23  (5.41%) | 0,062ns |
| Thiazide-like diuretics | 75  (33.94%) | 151  (35.53%) | 0,688ns |
| Loop diuretics | 29  (13.12%) | 95  (22.35%) | 0,005s |
| Antialdosteronic diuretics | 18  (8.15%) | 73  (17.17%) | 0,002s |
| Nitrate derivatives | 14  (6.33%) | 79  (18.59%) | <0,001s |
| Trimetazidine | 37  (16.74%) | 67  (15.76%) | 0,749ns |
| Amiodarone | 6  (2.71%) | 18  (4.23%) | 0,334ns |
| Propafenone | – | 5  (1.18%) | – |
| Ivabradine | – | 6  (1.41%) | – |
| Digoxin | 15  (6.78%) | 17  4% | 0,123ns |
| Centrally acting antihypertensive | 4  (1.81%) | 31  (7.29%) | 0,004s |
| Antiplatelet | 21  (9.50%) | 51  (12.00%) | 0,334ns |
| Statins | 64  (28.96%) | 182  (42.82%) | <0,001s |
| Fibrates | 3  (1.36%) | 16  (3.76%) | 0,087ns |
| Omega-3 acid ethyl esters | – | 1  (0.23%) | – |
| Ezetimibe | – | – | – |
| Acenocoumarol | 12  (5.43%) | 21  (4.94%) | 0,755ns |
| Sulodexide | 2  (0.90%) | 13  (3.06%) | 0,084ns |
| Pentoxifylline | 20  (9.05%) | 15  (3.53%) | 0,003s |
| Diosmin | 18  (8.15%) | 12  (2.82%) | 0,002s |
| Alpha-1 blockers | 19  (8.80%) | 31  (7.30%) | 0,501ns |
| 5-α-reductase inhibitors | 5  (2.26%) | 8  (1.88%) | 0,744ns |
| The nervous system | | | |
| Zopiclone | – | 5  (1.17%) | – |
| First generation antipsychotics | 2  (0.90%) | 2  (0.47%) | 0,508ns |
| Second generation antipsychotics | 1  (0.45%) | – | – |
| Selective serotonin reuptake inhibitors (SSRIs) | – | 12  (2.82%) | – |
| Tricyclic antidepressants | 1  (0.45%) | – | – |
| Tianeptine | 2  (0.90%) | 6  (1.41%) | 0,578ns |
| Venlafaxine | – | 5  (1.18%) | – |
| Mirtazapine | – | 4  (0.94%) | – |
| Trazodone | 1  (0.45%) | 7  (1.65%) | 0,191ns |
| Antiparkinsonian | 6  (2.71%) | 3  (0.71%) | 0,039s |
| Anti-dementia | 2  (0.90%) | 8  (1.88%) | 0,338ns |
| Antiepileptic | 4  (1.81%) | 22  (5.18%) | 0,039s |
| Vinpocetine | 14  (0.33%) | 18  (4.23%) | 0,005s |
| Vincamine | 2  (0.90%) | 8  (1.88%) | 0,338ns |
| Nicergoline | 20  (9.05%) | 15  (3.53%) | 0,003s |
| Cerebrolysin | – | 5  (1.17%) | – |
| Pramiracetam | 3  (1.36%) | 11  (2.59%) | 0,309ns |
| Piracetam | 10  (4.52%) | 3  (0.71%) | 0,001s |
| Betahistine | 16  (7.24%) | 51  (12.00%) | 0,06ns |
| The respiratory system | | | |
| 2nd generation H1-antihistamines | 9  (4.07%) | 3  (0.71%) | 0,003s |
| Antitussives | 2  (0.91%) | – | – |
| Erdosteine | – | – | – |
| Fenspiride | 3  (1.36%) | 9  (2.12%) | 0,498ns |
| Short-acting beta-agonists (SABAs) | – | 8  (1.88%) | – |
| Long-acting beta-agonists (LABAs) | 1  (0.45%) | 4  (0.94%) | 0,500ns |
| Long-acting anticholinergic bronchodilators | 1  (0.45%) | 4  (0.94%) | 0,500ns |
| Theophylline/Aminophylline | 10  (4.52%) | 41  (9.64%) | 0,022s |
| Antileukotrienes | 5  (2.26%) | 12  (2.82%) | 0,673ns |
| Inhaled corticosteroids | – | 3  (0.71%) | – |
| Systemic corticosteroids | 1  (0.45%) | 1  (0.23%) | 0,631ns |
| Ketotifen | 3  (1.36%) | – | – |
| Budesonide/formoterol | 2  (0.91%) | 5  (1.18%) | 0,754ns |
| Salmeterol/fluticasone | 7  (3.17%) | 14  (3.29%) | 0,935ns |
| Indacaterol/glycopyrronium | – | 2  (0.47%) | – |
| The gastrointestinal tract | | | |
| Proton-pump inhibitors (PPIs) | 31  (14.02%) | 84  (19.77%) | 0,070ns |
| H2 blockers | 1  (0.45%) | 3  (0.70%) | 0,700ns |
| Trimebutine/Mebeverine | 8  (3.62%) | 15  (3.53%) | 0,953ns |
| Domperidone/Metoclopramide | 1  (0.45%) | 1  (0.23%) | 0,631ns |
| The musculoskeletal system | | | |
| Nonsteroidal anti-inflammatory (traditional) | 21  (9.50%) | 22  (5.17%) | 0,036s |
| Nonsteroidal anti-inflammatory (coxibs) | 5  (2.26%) | 7  (1.65%) | 0,586ns |
| Tramadol | 2  (0.90%) | 7  (1.65%) | 0,441ns |
| Paracetamol + tramadol | 8  (3.62%) | 6  (1.41%) | 0,067ns |
| Bisphosphonates | 4  (1.81%) | 1  (0.23%) | 0,030s |
| Alfacalcidol | 2  (0.90%) | 12  (2.82%) | 0,112ns |
| Other drugs | | | |
| Iron supplements | 1  (0.45%) | – | – |
| Allopurinol | 1  (0.45%) | 21  (4.94%) | 0,003s |
| Oxybutynin | – | 4  (0.94%) | – |
| Levothyroxine | 2  (0.90%) | 5  (1.17%) | 0,753ns |
| Thiamazole | – | 1  (0.24%) | – |
| Dorzolamide/timolol | 2  (0.90%) | 1  (0.24%) | 0,243ns |
| Latanoprost/timolol | 1  (0.45%) | – | – |
| Brinzolamide/timolol | – | 1  (0.24%) | – |
| Travoprost | – | 1  (0.24%) | – |
